# Supplementary material for: Do Consumers Want Seaweed in Their Food? A Study Evaluating Emotional Responses to Foods Containing Seaweed
Source: Foods. 2021 Nov 9;10(11):2737. doi: 10.3390/foods10112737 (PMC8621969; doi:10.3390/foods10112737)
Supplement: Supplementary file 1 [file foods-10-02737-s001.zip › foods-1434073-supplementary.pdf]

## Supplementary Tables

**Supplementary Table S1. Studies investigating incorporation of seaweed in different food products using sensory analysis.**

| <b>Food item</b>             | <b>Type of Panel</b> | <b>Reference</b>               |
|------------------------------|----------------------|--------------------------------|
| Fish filet                   | Trained panel        | Deepitha et al., 2021          |
| Pasta<br>(durum<br>semolina) | Semi-trained panel   | Prabhasankar et al., 2009      |
| Frankfurters                 | Trained panel        | Jiménez-Colmenero et al., 2010 |
| Chicken<br>strips            | Trained panel        | Cofrades et al., 2011          |
| Frankfurters                 | Consumer panel       | Vilar et al., 2020             |
| Iberico<br>Cheese            | Trained panel        | del Olmo et al., 2018          |
| Yogurt                       | Consumer panel       | O’Sullivan et al., 2016        |
| Salmon<br>burgers            | Trained panel        | Dolea et al., 2018             |
| Instant fried<br>noodles     | Consumer panel       | Kumoro et al., 2016            |
| Fish cutlet                  | Trained panel        | Senthil et al., 2005           |
| Beef<br>burgers              | Consumer panel       | Cox & Abu-Ghannam, 2013        |
| Yogurt and<br>Quark          | Trained panel        | Nuñez & Picon, 2017            |
| Cooked egg<br>noodles        | Trained panel        | Chang & Wu, 2008               |
| Fish jerky                   | Semi-trained panel   | Hanjabam et al., 2017          |
| Bread                        | Consumer panel       | Lamont & McSweeney, 2021       |
| Coffee<br>beverage           | Semi-trained panel   | Kumar et al., 2019             |
| Spice Mix                    | Trained panel        | Senthil et al., 2011           |
| Extruded<br>Product          | Trained panel        | Singh et al., 2018             |
| Muffin                       | Consumer Panel       | Mamat et al., 2018             |

**Supplementary Table S2. Demographic details of the participants.**

| <b>Participants (n=108)</b> |    |
|-----------------------------|----|
| <b>Characteristics</b>      |    |
| <b>Age</b>                  |    |
| 19-20                       | 5  |
| 21-29                       | 26 |
| 30-39                       | 15 |
| 40-49                       | 18 |
| 50-59                       | 22 |
| 60-65                       | 14 |
| <b>Gender</b>               |    |
| Male                        | 37 |
| Female                      | 63 |
| Prefer not to say           | 0  |
| <b>Income</b>               |    |
| Less than \$25,000          | 10 |
| \$25,000-\$44,999           | 20 |
| \$45,000-\$64,999           | 14 |
| \$65,000-\$99,999           | 22 |
| \$100,000-\$149,000         | 6  |
| \$150,000+                  | 6  |
| Prefer not to say           | 22 |
| <b>Education</b>            |    |
| Some High School            | 3  |
| High School Graduate        | 18 |
| Some Post-Secondary         | 20 |
| Post-Secondary              | 21 |
| Certificate or Diploma      |    |
| Bachelor's Degree           | 30 |
| Above Bachelor's            | 8  |
| Degree                      |    |
